# Supplementary material for: Interface modulation in multi-layered BaTiO3 nanofibers/PVDF using the PVP linker layer as an adhesive for high energy density capacitor applications
Source: Royal Society of Chemistry journal article supplement (doi:10.1039/d0ma00240b), 2020-01-01
Supplement: d0ma00240b1.pdf [file d0ma00240b1.pdf]

## Supporting Information

### **Interface modulation in multi-layered BaTiO<sub>3</sub> nanofibers/PVDF using the PVP linker layer as an adhesive for high energy density capacitor applications**

Prateek<sup>a</sup>, Shahil Siddiqui<sup>a</sup>, Ritamay Bhunia<sup>b,c</sup>, Narendra Singh<sup>a,d</sup>, Ashish Garg<sup>b</sup> and Raju Kumar Gupta<sup>a,e,\*</sup>

<sup>a</sup>Department of Chemical Engineering, Indian Institute of Technology Kanpur, Kanpur 208016, Uttar Pradesh, India. E-mail: [guptark@iitk.ac.in](mailto:guptark@iitk.ac.in)

<sup>b</sup>Department of Materials Science and Engineering, Indian Institute of Technology Kanpur, Kanpur 208016, Uttar Pradesh, India

<sup>c</sup>Department of Materials Engineering, Indian Institute of Science, Bengaluru 560012, Karnataka, India

<sup>d</sup>Centre for Advanced Studies, Dr. A.P.J. Abdul Kalam Technical University, Lucknow, India

<sup>e</sup>Centre for Environmental Science and Engineering, Indian Institute of Technology Kanpur, Kanpur 208016, Uttar Pradesh, India

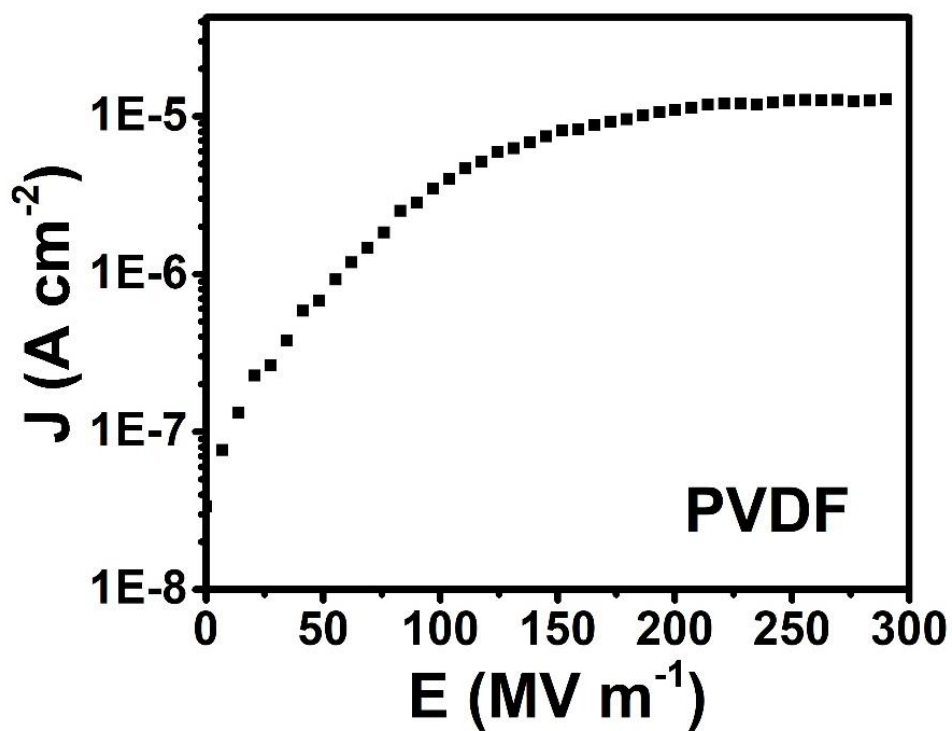

Fig. S1  $J$  vs.  $E$  curve of single-layered PVDF at  $E_b$ .

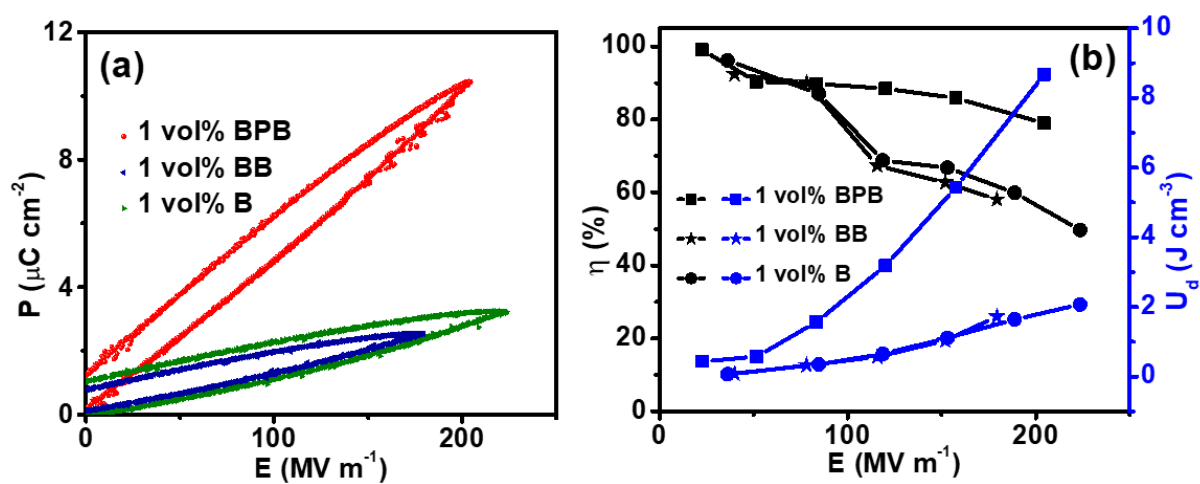

Fig. S2 (a)  $P$ - $E$  loops and (b)  $U_d$  and  $\eta$  of single layer 1 vol% B, 1 vol% BB, and 1 vol% BPB devices (B: BT NFs/PVDF, P: PVP).
